# Supplementary material
Source: Frontiers journal article supplement (https://www.frontiersin.org/articles/419459)
Supplement: Table_1.pdf [file Table_1.pdf]

| First author et al.   | Published in | Randomized | Sample size                                | Weight class (BMI, kg, lbs)                                                                                                                                         | Gender (m/f)                                                    | Age (mean +/- standard deviation)             | Method                                               | single/repetitive session(s)                   | Target region(s)/side                                                     | Side of stimulation                                                       | stimulation regimen (duration, frequency, pulse width, intensity)                                                                                                                        | Control condition (sham)        | Outcome (craving, liking, intake)                                                                                                                                                                                                                                                      | Effect duration                                                                                                                                                                                                                        | Effect size |  |
|-----------------------|--------------|------------|--------------------------------------------|---------------------------------------------------------------------------------------------------------------------------------------------------------------------|-----------------------------------------------------------------|-----------------------------------------------|------------------------------------------------------|------------------------------------------------|---------------------------------------------------------------------------|---------------------------------------------------------------------------|------------------------------------------------------------------------------------------------------------------------------------------------------------------------------------------|---------------------------------|----------------------------------------------------------------------------------------------------------------------------------------------------------------------------------------------------------------------------------------------------------------------------------------|----------------------------------------------------------------------------------------------------------------------------------------------------------------------------------------------------------------------------------------|-------------|--|
| Grundeis et al.       | 2017         | yes        | 25                                         | obese 102.5 kg ± 11.8 kg 82-130kg0 BMI 36.5 ± 4.1 31.4-45                                                                                                           | f                                                               | 28.8 ± 6.0 range 18-43                        | IDCS                                                 | single                                         | Left dorsolateral prefrontal cortex (DLPFC)                               | cathode left DLPFC F8; anode over right frontal operculum AF7; vice versa | 20 min; 2 mA                                                                                                                                                                             | sham-controlled                 | no confirmed effect on craving or calorie consumption                                                                                                                                                                                                                                  |                                                                                                                                                                                                                                        |             |  |
| Goldman et al.        | 2011         | yes        | 19                                         | 82.02 kg ± 25.31 kg BMI: 27.25 ± 6.24 (26.3% overweight, 31.6% obese)                                                                                               | 68.4% f                                                         | 32.47 ± 10.85                                 | IDCS                                                 | single                                         | prefrontal cortex                                                         |                                                                           | 20 min; 2 mA                                                                                                                                                                             | sham-controlled                 | greater significant reduction of craving especially sweet food and carbohydrates; no difference food intake                                                                                                                                                                            | temporary                                                                                                                                                                                                                              | d = .55     |  |
| Fregni et al.         | 2008         | yes        | 23                                         |                                                                                                                                                                     | 21 f                                                            | 23.7 ± 7.2                                    | IDCS                                                 | single                                         | 3 sessions (anodal, cathodal, sham)                                       | dorsolateral prefrontal cortex (DLPFC)                                    | anode left/cathode right; anode right/cathode left                                                                                                                                       | 20 min; 2 mA (constant current) | sham-controlled                                                                                                                                                                                                                                                                        | anode right/cathode left: food craving reduced; less frequent fixed at food-related pictures; consumed less food; anode left/cathode right: craving levels did not increase; active stimulation: caloric ingestion significantly lower |             |  |
| Kekic et al.          | 2014         | yes        | 17                                         | BMI 23.81 ± 2.60 range 19.85-29.28 70.6% healthy (18.5-24.9) 29.4% overweight (25-25.9)                                                                             | f                                                               | 19-55 26.41 ± 8.30                            | bilateral IDCS                                       | single                                         | dorsolateral prefrontal cortex (DLPFC)                                    | anode right(F4)/cathode left(F3) DLPFC                                    | 20 min; 2 mA                                                                                                                                                                             | sham-controlled                 | reduced: craving for sweet food not savory; no difference: TD, food consumption                                                                                                                                                                                                        | temporary                                                                                                                                                                                                                              |             |  |
| Lapenta et al.        | 2014         |            | 9                                          | BMI 21.9 ± 1.63 range 18.96-24.44 all normal weight                                                                                                                 | f                                                               | 20-27 23.4 ± 2                                | bilateral IDCS                                       | single                                         | DLPFC                                                                     | anode right/cathode left                                                  | 20 min; 2 mA; one week interval between real and sham                                                                                                                                    | sham-controlled                 | reduced frontal N2 component; enhanced P3a component of response to No-go stimuli (food or furniture) reduction caloric intake: food craving                                                                                                                                           |                                                                                                                                                                                                                                        |             |  |
| Montenegro et al.     | 2012         | yes        | 9                                          | overweight 84.7 kg (74.6-137.7kg) BMI 28.2 (25.2-43.5)                                                                                                              | 5 m; 4 f                                                        | 20-32 24                                      | IDCS                                                 | single                                         | DLPFC                                                                     | left (anode)                                                              | 20 min; 2 mA                                                                                                                                                                             | sham-controlled                 | left anodal: desire to eat decreased; greater effect IDCS + exercise: desire to eat & hunger                                                                                                                                                                                           |                                                                                                                                                                                                                                        | d = 3.0     |  |
| Gluck et al.          | 2015         | yes        | 9                                          | obese 94 ± 15 kg                                                                                                                                                    | 3m, 6f                                                          | 42 ± 8                                        | IDCS                                                 | repetitive                                     | 3 sessions of IDCS or sham over 9 days (total of 6 sessions over 3 years) | LDLPFC                                                                    | anode F3 cathode above right eye                                                                                                                                                         | 40 min; 2 mA                    | sham-controlled                                                                                                                                                                                                                                                                        | consumed fewer kilocalories per day; significant fewer kilocalories from side and fat; greater weight loss during anodal vs cathodal                                                                                                   |             |  |
| Jauch-Chara et al.    | 2014         | yes        | 14                                         | BMI 20-25 22.65 ± 0.34 (SEM)                                                                                                                                        | m                                                               | 21-28 24.81 ± 0.58 (SEM)                      | IDCS                                                 | repetitive                                     | Right dorsolateral prefrontal cortex (DLPFC)                              | anode right DLPFC; cathode left supraorbital                              | 2x 8 d daily stimulated IDCS/sham conditions 2-4 wk apart; 20 min; 1mA; fade in/out: 8s                                                                                                  | sham-controlled                 | anodal: reduces caloric intake 14% (in comparison with sham) no effect: protein intake and fat                                                                                                                                                                                         |                                                                                                                                                                                                                                        | d > 1.09    |  |
| Ljubicavljivic et al. | 2016         | yes        | 27                                         | BMI 25.6 ± 4.4 77.3 ± 18.3 kg                                                                                                                                       | 19 m; 8 f                                                       | 21.3 ± 2                                      | IDCS                                                 | repetitive                                     | right DLPFC                                                               | anode right/cathode left                                                  | 5 days 1 session per day; 20 min; anode right/cathode left; 2 mA current density kept at 0.06 mA/cm2; 1min ramp-up/ramp-down                                                             | sham-controlled                 | single session: reduced intensity of current food craving; repetitiv session: reduced habitual experiences of food craving; decreased craving for fast food & sweets, lesser for fat; no significant effect on craving for carbohydrates; no association with initial weight or weight | after 5-days; after 30-days: repetitive: current and habitual food craving significant reduced; single: no significant effect                                                                                                          |             |  |
| Barth et al.          | 2011         | yes        | 10                                         | mean: BMI 27.8 165.8lb SD: 8.0 50.3lb (healthy)                                                                                                                     | f                                                               | Mean: 28.3 SD: 6.5                            | single session rTMS                                  | single                                         | left prefrontal cortex (PFC)                                              | left                                                                      | 10 Hz, 100% resting motor threshold, 10 s-on, 20 s-off for 15 min; 3000 pulses in a single 15 min session                                                                                | sham-controlled                 | Cravings significantly lower regardless real or sham; not significant: -condition main effect and time by condition interaction - difference in hours since last ate                                                                                                                   |                                                                                                                                                                                                                                        | d = 0.09    |  |
| Camus et al.          | 2009         | no         | Exp1: 56<br>Exp2: 15                       | Normal-weight BMI 18-25                                                                                                                                             | 1: m 30 2: m 8                                                  | 1: mean 22 range 19-26 2: mean 21 range 19-25 | rTMS; inhibitory                                     | single                                         | Right dorsolateral prefrontal cortex (DLPFC) (sham: vertex)               | right                                                                     | Single 15 min, 50% of stimulator maximum 1 Hz rTMS train, 900 pulses                                                                                                                     | sham-controlled                 | 1: -downmodulation of computation of goals values<br>2: effect might be specific to computation of goals values                                                                                                                                                                        |                                                                                                                                                                                                                                        |             |  |
| Uher et al.           | 2005         | yes        | 28                                         | BMI: real 27.7 ± 5.5 sham: 23.3 ± 5.3                                                                                                                               | f                                                               | real: 25.2 ± 5.4 sham: 26.4 ± 4.9             | rTMS                                                 | single                                         | Left dorsolateral prefrontal cortex                                       | left                                                                      | Single session, 10 Hz, intensity 110%; 1000 pulses over 20 min                                                                                                                           | sham-controlled                 | Inhibits the development of craving                                                                                                                                                                                                                                                    |                                                                                                                                                                                                                                        | d = .85     |  |
| Lowe et al.           | 2008         | ?          | 28                                         | BMI: mean 23.64 SD 3.352 normal weight                                                                                                                              | f                                                               | mean 20.43 SD 1.345                           | rTMS, cTBS                                           | pre-/post-stimulation + active cTBS, sham cTBS | Left dorsolateral prefrontal cortex (DLPFC)                               | left                                                                      | 1 week intersession intensity 80% RMT; 40s continuous train; 600 pulses in theta burst pattern 3 stimuli at 50Hz repeated at 5Hz frequency                                               | sham-controlled                 | caloric intake higher; high calorie food preferred over low calorie;                                                                                                                                                                                                                   |                                                                                                                                                                                                                                        |             |  |
| Kim et al.            | 2008         | yes        | 57 obese adults<br>TMS:29<br>Sham: 28      | BMI: -TMS: 86.90 ± 23.61<br>-Sham: 78.90± 17.04                                                                                                                     | TMS: m 13(44.8%) f 16(55.2%)<br>Sham: m 13 (46.4%) f 15 (53.6%) | TMS: 38.66 ± 10.41<br>Sham: 43.32 ± 11.92     | Repetitive transcranial mangnetic stimulation (rTMS) | repetitive 4 sessions                          | Left dorsolateral prefrontal cortex (DLPFC)                               | left                                                                      | 2 weeks intervention 2 weeks F/U; 4 sessions; 20 trains of 5 s with 55-s inter-train intervals; frequency 10 Hz; intensity 110% of individual's motor threshold; 1000 pulses over 20 min | sham-controlled                 | reduction: weight, BMI, fat mass VAT kilocalories, protein, fat intake; increased: feeling of fullness; no change: hunger and desire                                                                                                                                                   | 2 weeks                                                                                                                                                                                                                                |             |  |
| Ruiz-Tovar et al.     | 2014         | yes        | 105; group 1: 45; group 2: 45; group 3: 15 | (group 1/2/3) BMI: 46.1±7.5/45.3±6/32.5±2.4 weight: 123.3±25.1/121.3±20.6/82.8±10.2 kg                                                                              | 80% f; 20% m                                                    | 45.6 ± 14.3 (21-74)                           | percutaneous electrical neurostimulation(PENS )      | 12 sessions                                    | dermatome T6                                                              |                                                                           | 30 min session/week for 12 weeks; 20Hz (0-20 mA)                                                                                                                                         | control group                   | group 1: significant reduction weight(7.1±1.5kg, BMI(2.7±0.5), appetite along with diet; 10.7±2.6 % EWL                                                                                                                                                                                |                                                                                                                                                                                                                                        |             |  |
| Ruiz-Tovar et al.     | 2016         |            | 150                                        | obese pat, BMI 30-40                                                                                                                                                |                                                                 |                                               | PENS                                                 |                                                | dermatome T6                                                              |                                                                           |                                                                                                                                                                                          |                                 | weight loss after 12 weeks: 11.8±2.6kg; 3 months after completing 14.6±2.7kg; 9 months 14.5±2.8kg; appetite (VAS) pre 6; after treatment 1, 3 months 1, 9 months 4; appetite is restored after 3 months, no weight regain                                                              | 3 months                                                                                                                                                                                                                               |             |  |
| Ikramuddin et al.     | 2014         | yes        | 239 VNB: 162 sham: 77                      | BMI 41 ± 3 VNB: 113 ± 13kg sham: 116 ± 14kg comorbidity: (VNB/sham) DM2 96%(46/8%); Hypertension 63(39%)/32(42%); Dyslipidemia 91(56%)/46(60%); OSA 33(20%)/23(30%) | VNB: 141 (87%) f sham: 62 (81%) f                               | VNB: 47 ± 10 Sham: 47 ± 9                     | invasive VNS                                         | invasive 12 month period                       | anterior and posterior vagal nerve (gastroesophageal junction)            |                                                                           | 6-8 mA; 12h/d                                                                                                                                                                            | sham-controlled                 | VNB: 24.4% excess weight loss (9.2% of initial body weight loss) sham: 15.9%(6.0%) mean difference 8.5% VNB: 25% of pat. achieved 20% or more EWL, 38% achieved 25% or more loss                                                                                                       | 12 months                                                                                                                                                                                                                              |             |  |
| Shikora et al.        | 2015         | yes        | 239                                        | BMI 41 ± 3 VNB: 113 ± 13kg sham: 116 ± 14kg comorbidity: (VNB/sham) DM2 96%(46/8%); Hypertension 63(39%)/32(42%); Dyslipidemia 91(56%)/46(60%); OSA 33(20%)/23(30%) | VNB: 141 (87%) f sham: 62 (81%) f                               | VNB: 47 ± 10 Sham: 47 ± 9                     | invasive VNS                                         | 18 month result                                | anterior and posterior vagal nerve (gastroesophageal junction)            |                                                                           | unblinding                                                                                                                                                                               | sham-controlled                 | 18-month weight loss vBLoc: 23% EWL(8.8%TWL) sham: 10%EWL(3.8%TWL) vBLoc: maintained 12-month weight loss 23%EWL (9.7%) sham: regained over 40% of the 17%EWL(6.4%TWL) by 18 month, most weight regain preceded unblinding                                                             | 18 months                                                                                                                                                                                                                              |             |  |
| Shikora et al.        | 2016         |            | 28                                         | T2DM; obese pat.; 107 ± 16kg BMI 37 ± 3                                                                                                                             | 17 f (61%)                                                      | 51 ± 9                                        | invasive VNS                                         | 2 year results                                 | vagal nerve                                                               |                                                                           | 5000 Hz; 3-8 mA for at least 12h each day (goal: 6mA for 14h/d)                                                                                                                          | no control                      | 57% achieved 20% EWL/5% TWL 43% achieved 25%EWL/7.5%TWL; 30% achieved 10%TWL                                                                                                                                                                                                           | 2 years                                                                                                                                                                                                                                |             |  |
| Whiting et al.        | 2013         |            | 3                                          | (lbs/BMI) 278.7/49.4(HTN); 326/48.1(sleep apnoe, DM2;HTN; migraine); 314/45(lower-extremity edema)                                                                  | 2 f, 1 m                                                        | 60, 50, 45                                    | DBS                                                  | 35 months                                      | lateral hypothalamic area (LHA)                                           | bilateral                                                                 | monopolar or bipolar stimulation; 90 usec pulse width; 185 Hz                                                                                                                            |                                 | significant weight loss 2 patients; 1 stable; increase RMR certain contacts/voltages                                                                                                                                                                                                   |                                                                                                                                                                                                                                        |             |  |
| Ho et al.             | 2015         |            |                                            |                                                                                                                                                                     |                                                                 |                                               | DBS                                                  |                                                | lateral hypothalamic area (LHA)                                           |                                                                           |                                                                                                                                                                                          |                                 |                                                                                                                                                                                                                                                                                        |                                                                                                                                                                                                                                        |             |  |
| Harati et al.         | 2016         |            | 1                                          | 151.4kg                                                                                                                                                             | f                                                               | 19                                            | DBS                                                  |                                                | nucleus accumbens                                                         | bilateral                                                                 | both electrodes bipolar stimulation; 208 us pulse width, 130 Hz, 2 mA-3.75 mA                                                                                                            |                                 | 14 months after surgery 138kg, BMI 48.3; no feeling of increased appetite nor need for food; accidental switch off of pacemaker: increased craving for food                                                                                                                            |                                                                                                                                                                                                                                        |             |  |
